# Supplementary material for: Distribution of cervical intraepithelial neoplasia on the cervix in Chinese women: pooled analysis of 19 population based screening studies
Source: Springer Nature journal article supplement (doi:10.1186/s12885-015-1494-4), 2015-06-26
Supplement: MOESM1 [file 9744772]

Appendix 1: Summary of studies conducted from 1999-2010

| Study          | Study year; location                                     | Number screened | Age   | Screening tests                                                | Follow-up procedure                                                                                                                                                                                    | Histology or cytology location and review                                                                                                 | Number biopsied |
|----------------|----------------------------------------------------------|-----------------|-------|----------------------------------------------------------------|--------------------------------------------------------------------------------------------------------------------------------------------------------------------------------------------------------|-------------------------------------------------------------------------------------------------------------------------------------------|-----------------|
| SPOCCS I       | 1999; Xiangyuan County, Shanxi Province                  | 1997            | 35–45 | HC2 (self, physician), fluorescence test, LBC, VIA, colposcopy | All women received four-quadrant biopsies and ECC under colposcopy                                                                                                                                     | CICAMS, blinded international review                                                                                                      | 1997            |
| SPOCCS II      | 2001–02; Xiangyuan and Yangcheng County, Shanxi Province | 8497            | 35–50 | HC2 (self, physician), LBC, VIA, AFB                           | positive VIA, self-test or physician-test for high-risk HPV, or an abnormal AFB, or a positive Pap test (ASC-US or worse):4-quadrant biopsies and ECC                                                  | CICAMS                                                                                                                                    | 3253            |
| SPOCCS III-(1) | 2006; Xiangyuan County, Shanxi Province                  | 884             | 16–54 | HC2 (self, physician), LBC, VIA                                | Positive VIA or positive self-HC2 (colposcopy and directed biopsy, ECC if necessary); positive physician-collected HC2 or ASC-H or worse on LBC (colposcopy and 4-quadrant biopsies, ECC if necessary) | CICAMS; blinded international review                                                                                                      | 185             |
| SPOCCS III-(2) | 2006; Beijing                                            | 795             | 16–54 | HC2, LBC, VIA                                                  | Positive VIA (colposcopy and directed biopsy, ECC if necessary); positive physician-collected HC2 and ASC-US on LBC or ASC-H or worse (colposcopy and 4-quadrant biopsies, ECC if necessary)           | Peking University People's Hospital, blinded international and CICAMS review                                                              | 69              |
| SPOCCS III-(3) | 2006; Xinmi, Henan Province                              | 879             | 16–54 | HC2 (self, physician), LBC, VIA                                | Same as SPOCCS III-(1)                                                                                                                                                                                 | CICAMS, blinded international review (only histology)                                                                                     | 164             |
| SPOCCS III-(4) | 2006; Yutian County, Xinjiang Uygur Autonomous Region    | 883             | 16–54 | HC2 (self, physician), LBC, VIA                                | Same as SPOCCS III-(1)                                                                                                                                                                                 | CICAMS, blinded international review (histology); People's Hospital of Xinjiang Uygur Autonomous Region, blinded CICAMS review (cytology) | 138             |
| SPOCCS III-(5) | 2007; Shanghai city                                      | 774             | 16–54 | HC2, LBC, VIA                                                  | Positive VIA (colposcopy and directed biopsy, ECC if necessary); positive physician-collected HC2 or ASC-H or worse (colposcopy and four-quadrant biopsies, ECC if necessary)                          | Shanghai, blinded international and CICAMS review (for cytology, blinded CICAMS review only)                                              | 43              |
| START 2003     | 2003; Xiangyuan County, Shanxi                           | 2005            | 30–49 | HC2, LBC, VIA                                                  | Positive VIA, HC2 positive, or ASC-H or worse on LBC (colposcopy and four-quadrant biopsies and                                                                                                        | CICAMS, blinded international review                                                                                                      | 523             |

|            | Province                                                                                             |      |       |                                                    | ECC)                                                                                                                                                                                                                                                    |                                                                                                                             |      |
|------------|------------------------------------------------------------------------------------------------------|------|-------|----------------------------------------------------|---------------------------------------------------------------------------------------------------------------------------------------------------------------------------------------------------------------------------------------------------------|-----------------------------------------------------------------------------------------------------------------------------|------|
| START 2004 | 2004; Xiushui County, Jiangxi Province                                                               | 2499 | 30–49 | HC2, LBC, VIA, VILI, colposcopy                    | Positive VIA, VILI, or colposcopy (four-quadrant biopsies and ECC); negative VIA or VILI but HC2 positive, or ASC-H or greater on LBC (repeat colposcopy and four-quadrant biopsies and ECC)                                                            | Jiangxi, blinded international and CICAMS review                                                                            | 537  |
| START 2005 | 2005; Wudu County, Gansu Province                                                                    | 2053 | 30–49 | HC2, LBC, VIA, VILI                                | Positive VIA or VILI (colposcopy and directed biopsy, and ECC if necessary); negative VIA or VILI but HC2 positive, ASC-H or worse on LBC (colposcopy and 4-quadrant biopsies and ECC)                                                                  | Gansu Cancer Hospital, blinded international and CICAMS review (histology); CICAMS, blinded international review (cytology) | 381  |
| START 2006 | 2006; Qinxian County, Shanxi Province                                                                | 2500 | 30–49 | HC2, LBC, VIA, VILI, colposcopy                    | Same as START 2005                                                                                                                                                                                                                                      | CICAMS; blinded international review                                                                                        | 559  |
| START 2007 | 2007; Xiangyuan and Wuxiang County, Shanxi Province                                                  | 2530 | 30–54 | HC2, careHPV, LBC, VIA, colposcopy                 | Positive VIA or colposcopy (directed biopsy, and ECC if necessary); negative VIA but HC2 or careHPV positive or ASC-H or worse on LBC (repeat colposcopy and four-quadrant biopsies and ECC if necessary)                                               | CICAMS, blinded international review                                                                                        | 691  |
| START-UP   | 2010; Yangcheng County, Shanxi Province; Xinmi City, Henan Province; Tonggu County, Jiangxi Province | 7543 | 25–65 | HC2, careHPV, E6 test, VIA, colposcopy             | Positive HC2, careHPV or E6 (positive colposcopy with directed biopsies, and ECC if necessary). Negative colposcopy with random biopsy and ECC); HC2, careHPV and E6 all negative (10% of the negative women undergo 4-quadrants random biopsy and ECC) | CICAMS                                                                                                                      | 3197 |
| IARC-(1)   | 2005; Shenzhen City, Guangdong Province                                                              | 1137 | 15–59 | HC2, LBC, VIA, colposcopy                          | Positive colposcopy (directed biopsy, and ECC if necessary); negative colposcopy, but HC2 positive and ASC-US, or LSIL or worse on LBC (repeat colposcopy with directed biopsies, and ECC if necessary)                                                 | Shenzhen, blinded CICAMS review                                                                                             | 122  |
| IARC-(2)   | 2004; Yangcheng County, Shanxi Province                                                              | 745  | 15–59 | HC2, fluorescence test, LBC, VIA, VILI, colposcopy | Positive colposcopy or fluorescence test (directed biopsy and ECC if necessary); negative colposcopy, but HC2 positive and ASC-US, or LSIL or worse on LBC (follow-up 1 year later)                                                                     | Yangcheng County Cancer Hospital, blinded international and CICAMS review (for histology, blinded CICAMS review only)       | 306  |

|                   |                                                               |       |       |                                               |                                                                                                                                                                                                                                                                                             |                                         |       |
|-------------------|---------------------------------------------------------------|-------|-------|-----------------------------------------------|---------------------------------------------------------------------------------------------------------------------------------------------------------------------------------------------------------------------------------------------------------------------------------------------|-----------------------------------------|-------|
| IARC-(3)          | 2005;Shenyang City, Liaoning Province                         | 719   | 15-59 | fluorescence test, LBC, VIA, VILI, colposcopy | Positive VIA, VILI or fluorescence test (directed biopsy and ECC if necessary); negative colposcopy, but ASC-US, LSIL or worse on LBC (repeat colposcopy with random or directed biopsies, and ECC if necessary)                                                                            | Liaoning Cancer Hospital, CICAMS review | 243   |
| FastHPVtrial      | 2007; Qinxian County, Shanxi Province                         | 818   | 30–50 | HC2, careHPV, LBC, VIA, VILI                  | Either VIA or VILI or careHPV was positive (colposcopy and directed biopsy, and ECC if necessary); VIA and VILI and careHPV were negative, or colposcopy was negative, but HC2 positive or LSIL or worse on cytology (four-quadrant biopsies, and ECC if necessary)                         | CICAMS                                  | 63    |
| Prevalence survey | 2008; Binhai and Jintan County, Xuzhou city, Jiangsu Province | 316   | 18–25 | HC2, LBC, VIA                                 | Positive VIA (colposcopy and directed biopsy, and ECC if necessary); negative VIA but ASC-H or worse on LBC (colposcopy and four-quadrant biopsies, and ECC if necessary); negative VIA but HC2 positive and ASC-US or better on LBC (colposcopy and directed biopsy, and ECC if necessary) | CICAMS                                  | 40    |
| HC2 trial         | 2008; Xiangyuan County, Shanxi Province                       | 1059  | 30–59 | HC2, LBC, VIA, VILI                           | Positive VIA or VILI: directed biopsy, and ECC if necessary; negative VIA or VILI but HC2 positive and ASC-US, or ASC-H or worse on LBC (colposcopy and four-quadrant biopsies, and ECC if necessary); either HC2 positive or ASC-US on LBC (directed biopsy, and ECC if necessary)         | CICAMS                                  | 145   |
| Total             |                                                               | 38633 |       |                                               |                                                                                                                                                                                                                                                                                             |                                         | 12656 |

SPOCCS=Shanxi Province Cervical Cancer Screening Study. HC2=Hybrid Capture 2. LBC=liquid-based cytology. VIA=visual inspection with acetic acid. ECC=endocervical curettage. CICAMS=Cancer Institute and Hospital of the Chinese Academy of Medical Sciences. AFB=Ampersand's fluorescent biomolecular markers. ASC-US=atypical squamous cells of undetermined significance. ASC-H=atypical squamous cells cannot exclude high-grade squamous intraepithelial lesion. VILI=visual inspection with Lugol's iodine. START=Screening Technologies to Advance Rapid Testing. START-UP=Screening Technologies to Advance Rapid Testing—Utility and Program Planning
